# Supplementary material for: The Effect of Eating Sea Cucumber Jelly on Candida Load in the Oral Cavity of Elderly Individuals in a Nursing Home
Source: MDPI journal article supplement (doi:10.3390/md11124993), 2013-12-11

## Supplementary Information

**Table S1.** MIC of HTX for various bacteria.

**Table S2.** The effects of *S. japonicus* jelly on healthy volunteers.

**Figure S1.** Effects of HTX on bacterial growth. Growth curves of the Gram-positive bacterium *S. oralis* (A) and the Gram-negative bacterium *E. coli* (B), measured as OD<sub>600</sub> ( $\pm$ standard deviation, duplicate analysis, repeated three times), at several concentrations of HTX, as indicated in the graph.

**Table S1.** MIC of HTX for various bacteria.

|                                        | MIC ( $\mu\text{g/mL}$ ) |
|----------------------------------------|--------------------------|
| Gram-positive bacteria                 |                          |
| <i>Streptococcus oralis</i> ATCC10557  | >256                     |
| <i>S. sanguinis</i> JCM5708            | >256                     |
| <i>S. gordonii</i> DL1                 | >256                     |
| <i>S. mutans</i> UA159                 | >256                     |
| <i>Actinomyces viscosus</i> JCM8353    | >256                     |
| Gram-negative bacteria                 |                          |
| <i>Fusobacterium nucleatum</i> JCM8532 | >256                     |
| <i>Escherichia coli</i> DH5 $\alpha$   | >256                     |

**Table S2.** The effects of *S. japonicus* jelly on healthy volunteers.

| Volunteer                  |                     | A  | B | C |
|----------------------------|---------------------|----|---|---|
| <i>Candida</i><br>(cfu/mL) | Before intervention | 44 | 9 | 3 |
|                            | After intervention  | 0  | 0 | 0 |

Three healthy volunteers (A, B, C) ate jelly containing *S. japonicus* for 2 weeks. The mouth wash solution (MW) was collected by gargling with 30 mL H<sub>2</sub>O. MW was concentrated to 10 mL by collecting microbes by centrifugation. The number of oral *Candida* were indicated as number of colonies formed by 0.5 mL of MW on the CHROMagar *Candida* plate incubated at 35 °C for 48 h.

**Figure S1.** Effects of HTX on bacterial growth. Growth curves of the Gram-positive bacterium *S. oralis* (A) and the Gram-negative bacterium *E. coli* (B), measured as OD<sub>600</sub> ( $\pm$ standard deviation, duplicate analysis, repeated three times), at several concentrations of HTX, as indicated in the graph.

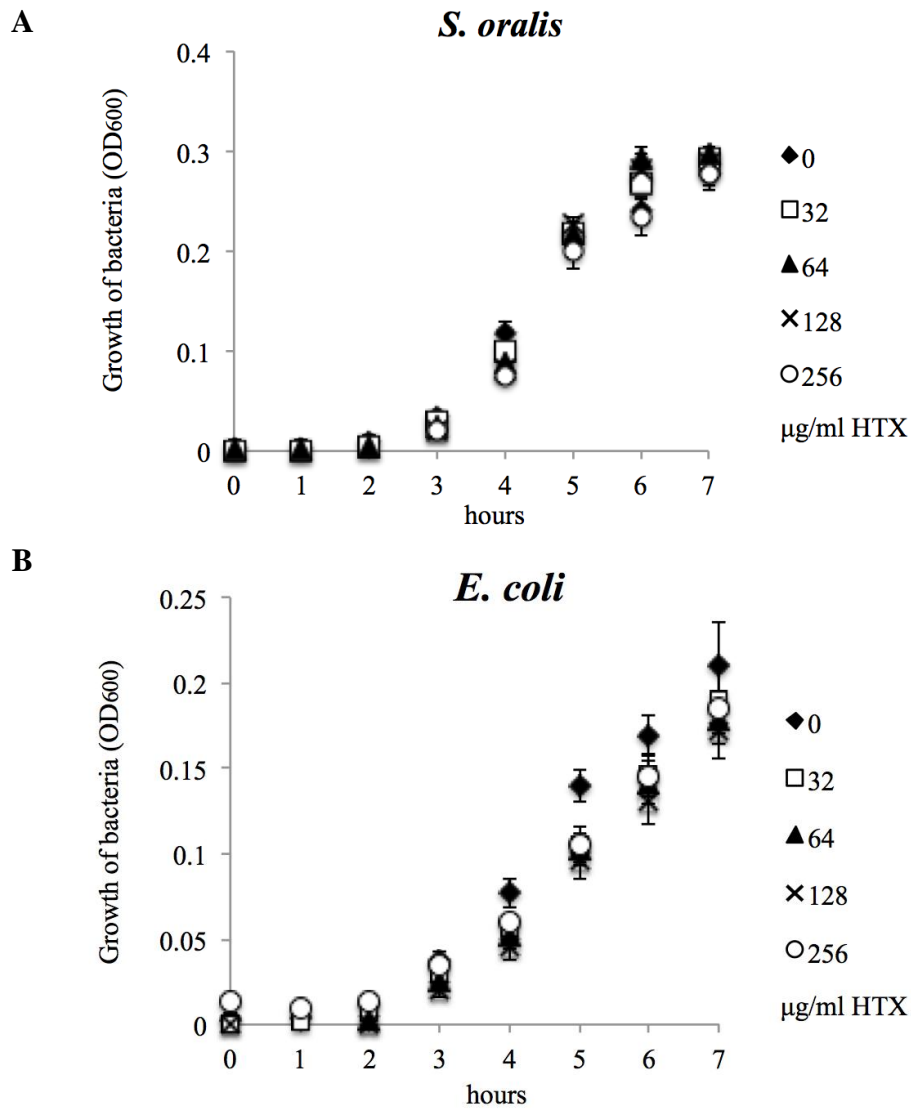

Supplement: s1 [file s1]
